# Supplementary material
Source: HighWire-hosted journal article supplement (doi:10.1101/rna.080291.124)
Supplement: Supplemental_Legends.docx [file Supplemental_Legends.docx]

Table S1. Fraction of trajectory frames with hydrogen bonds present between the selected ribosomal protein residues and the DNA-mRNA construct. Errors are calculated from standard deviation between the three runs.

Table S2. Fraction of trajectory frames with hydrogen bonds present between the selected ribosomal protein residues and the DNA-mRNA construct for the individual runs of the +11 system. The separation between S6 and L9 proteins was observed for Run 2.

**Figure S1.** A constructed FRET histogram of S6-Cy5.L9-Cy3 m291-bound ribosomes containing tRNAfMet in the P site.

**Figure S2.** Representative trace of S6-Cy5/L9-Cy3 *dnaX*-bound ribosomes containing a deacylated tRNAfMet in the P site. A) Hyper-rotated state. B) Rotated state. C) Non-rotated state. D) A dynamic molecule fluctuating between rotated and non-rotated states. Cy3 and Cy5 intensities are shown in green and red, respectively. The calculated FRET curve is shown in blue. Solid black lines highlight the different FRET states identified in the trace using Hidden Markov Modelling (HMM).

**Figure S3.** Selected snapshots from the end of MD simulations comparing the structures of different constructs, A) +15 system. B) +13 system. C) +11 system. In all subfigures, the mRNA is colored black, while the DNA 15-mer is colored blue. The ribosomal proteins S3, S4, and S5 are colored orange, red and green, respectively. The locations of the DNA strands’ 3’ ends are marked with a magenta circle.

**Figure S4:** A) A sample FRET trajectory of a single-molecule with discrete FRET states identified via hidden markov modeling (HMM). Solid black line represents the hidden markov model fitting of the data. 𝝉 High represents the dwell time of the non-rotated state, 𝝉Low represents the dwell time of the rotated state. Dwell time is the time spent in a specific state before transitioning to a different state. B & C) Dwell time analysis after determining dwell times using a combined approach of HMM and thresholding. Measured dwell times from all traces were binned and plotted as a cumulative distribution and then fit with single-exponential functions using IgorPro. Kinetic rate constants for the transition from the non-rotated state to the rotated state (B), or the rotated state to the non-rotated state were calculated directly from the exponential fit (s-1).

**Figure S5.** A) Root mean square fluctuations (RMSF) for the S4 residues in the +15, +13, and +11 systems. The black line shows the average between the three runs, and the red area shows standard deviation. B). Structure of S4 (red) with the loop of flexible residues 20-30 shown in gray. The position of DNA/mRNA (blue and black) relative to S4 is also shown.

**Figure S6.** Snapshots of S6 (magenta), and L9 (brown) from our simulation, the residues involved in the FRET experiments are shown in blue. A) A snapshot from +15 system representing a typical orientation of S6 and L9 in our simulations. B) Separation of S6 and L9 observed in one of our simulations for the +11 system.
