# Supplementary material
Source: HighWire-hosted journal article supplement (doi:10.1101/rna.080291.124)
Supplement: Supplemental_Table_S1.docx [file Supplemental_Table_S1.docx]

| Residue | +11 systen | +13 systen | +15 system |
| --- | --- | --- | --- |
| S3 R130 | 0.91±0.05 | 0.34±0.37 | 0.14±0.1 |
| S3 R131 | 0.75±0.25 | 0.15±0.10 | 0.37±0.15 |
| S4 R46 | 0.73±0.17 | 0.59±0.37 | 0.26±0.18 |
| S4 R187 | 0.59± 0.37 | 0.16±0.14 | 0.10± 0.13 |
| S5 R19 | 0.61±0.38 | 0.07±0.05 | 0.54± 0.29 |
