# Supplementary material
Source: HighWire-hosted journal article supplement (doi:10.1101/rna.080291.124)
Supplement: Supplemental_Table_S2.docx [file Supplemental_Table_S2.docx]

| Residue | Run 1 | Run 2 | Run 3 |
| --- | --- | --- | --- |
| R130 | 0.954 | 0.842 | 0.948 |
| R131 | 0.964 | 0.894 | 0.382 |
| R46 | 0.846 | 0.846 | 0.49 |
| R187 | 0.07 | 0.83 | 0.866 |
